# Supplementary material
Source: PubMed Central journal article supplement (PMC4066516)
Supplement: 1407540111_pnas.201407540SI.pdf [file 1407540111_pnas.201407540SI.pdf]

# Supporting Information

Zhang et al. 10.1073/pnas.1407540111

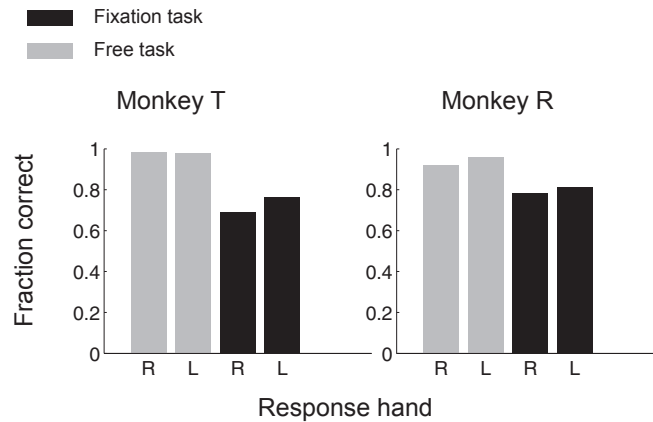

**Fig. S1.** Performance of monkeys in the free and fixation tasks. Ordinate, fraction correct; abscissa, hand; gray, free task; black, fixation task; R, right hand; L, left hand.

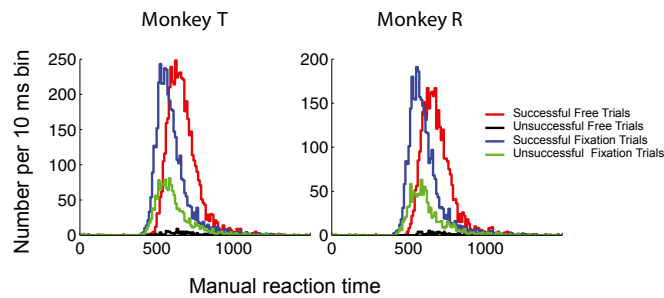

**Fig. S2.** Latency distributions of manual reaction time for all trials for all cells. Ordinate, number of trials per 10-ms bin. Abscissa, manual reaction time.

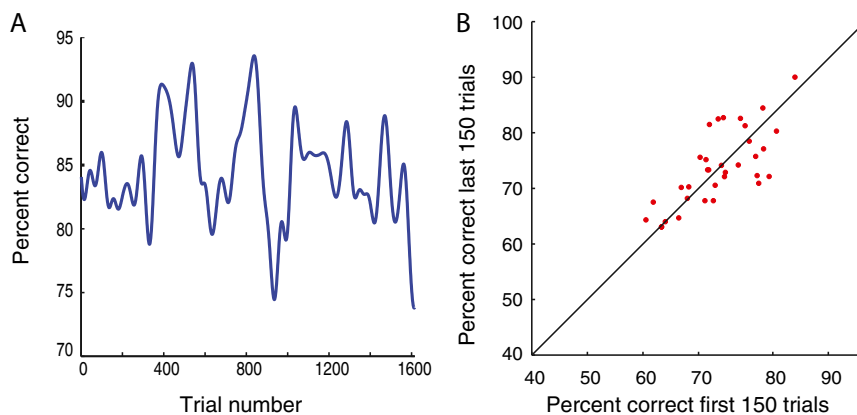

**Fig. S3.** Performance is level throughout the day. (A) Example of performance on fixation trials on a single day. Smoothed performance function (percent correct, ordinated) plotted against trial number. The performance function was calculated by convolving the impulse vector of performance (1 for good trials, 0 for error trials) with a Gaussian of mean 0, variance 2, and a width of 200 pts. (B) No difference between success rates on the first and last 150 trials. The percent correct for the last 150 trials (ordinate) plotted against the percent correct for the first 150 trials (abscissa) for each cell.

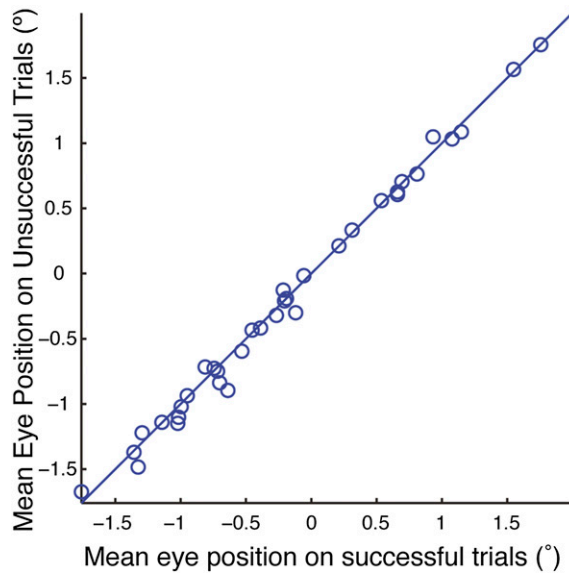

**Fig. S4.** No difference in eye position between successful and unsuccessful trials. Eye position for unsuccessful trials (ordinate) plotted against eye position for successful trials (abscissa). Straight line is  $x = y$ .  $P > 0.05$  by Wilcoxon signed-rank test. This analysis was done only for monkeys G and R.

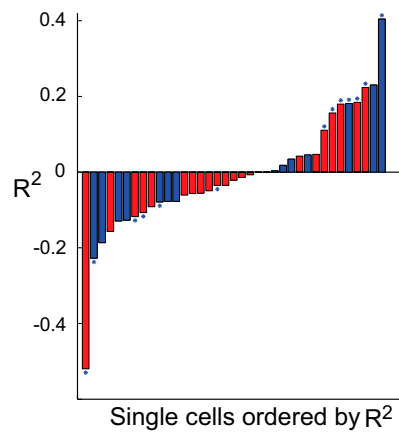

**Fig. S5.** Spearman correlation coefficients of regression of reaction time on baseline values. Ordinate, significance of correlation. Abscissa, value for each cell, ordered by increasing correlation. Asterisks mark  $P < 0.05$ . Red bars, monkey T; blue bars, monkey R.

**Table S1. Total number of correct and incorrect trials sorted by type**

| Trial type                             | Monkey R | Monkey G | Monkey T |
|----------------------------------------|----------|----------|----------|
| Correct saccade trials                 | 8,886    | 9,542    | 19,857   |
| Wrong-hand saccade trials              | 577      | 159      | 568      |
| Correct fixation trials                | 7,586    | 9,531    | 15,976   |
| Wrong-hand fixation trials             | 1,898    | 1,952    | 6,646    |
| Fixation trials, saccade to target     | 1,276    | 161      | 199      |
| Fixation trials, saccade to distractor | 368      | 47       | 79       |
| Fixation trials, random saccades       | 794      | 29       | 142      |
